# Supplementary material
Source: Springer Nature journal article supplement (https://www.springermedizin.de/resource/supplementary/10194_2014_1008_MOESM3_ESM.pdf/9423358)

## Allodynia

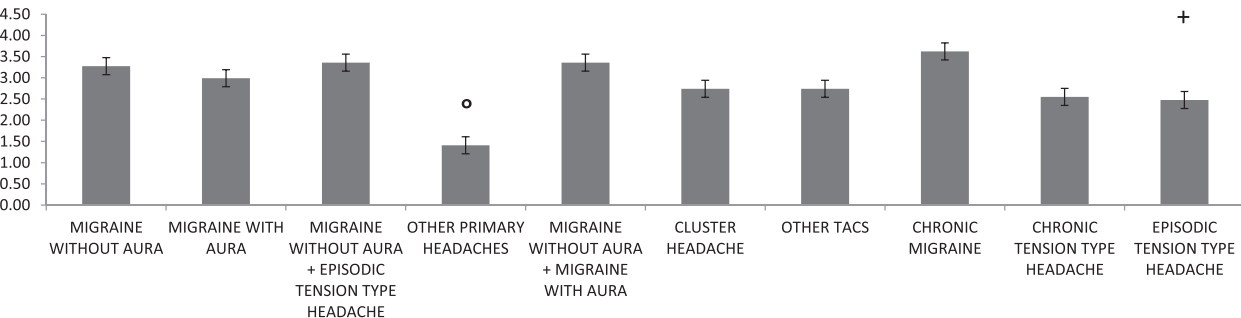

## Pericranial Tenderness

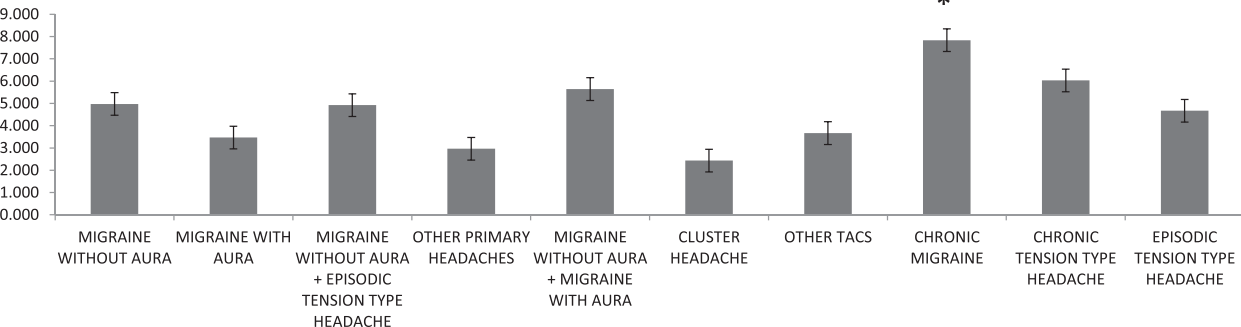

Supplement: MOESM3 [file 9423358]
